# Supplementary material for: Understanding the mechanism of stereoselective synthesis of cyclopentenes via N-heterocyclic carbene catalyzed reactions of enals with enones
Source: Royal Society of Chemistry journal article supplement (doi:10.1039/c0ob00088d), 2010-01-01
Supplement: c0ob00088d.pdf [file c0ob00088d.pdf]

## SUPPORTING INFORMATION

Understanding the Mechanism of Stereoselective Synthesis of  
Cyclopentenes via N-Heterocyclic Carbene Catalyzed Reactions of enals  
with enones.

Luis R. Domingo,\* Ramón J. Zaragoza and Manuel Arnó

Departamento de Química Orgánica, Universidad de Valencia.

Dr. Moliner 50, E-46100 Burjassot, Valencia (Spain).

## Index

- SI3 Table S1.** B3LYP/6-31G\*\* Enthalpies (H, in au) and free energies (G, in au) computed at 298.15 K and 1 atm in THF of the stationary points involved in the NHC catalyzed addition of the *E*-but-2-enal **12** to *E*-pent-3-en-2-one **13**.
- SI4 Table S2.** MPWB1K/6-31G\*\* Total and relative enthalpies (H, in au, and  $\Delta H$ , in kcal/mol) and total and relative free energies (G, in au, and  $\Delta G$ , in kcal/mol) computed at 298.15 K and 1 atm in THF of the stationary points involved in the formation of the bicyclic lactone **22**.
- SI5 Table S3.** B3LYP/6-31G\*\* Total energies (E, in au), in gas-phase and THF, of the TSs associated with nucleophilic addition of the Breslow intermediate **26** to the chalcone **10**.
- SI5 Table S4.** B3LYP/6-31G\*\* Enthalpies (H, in au) and free energies (G, in au) computed at 298.15 K and 1 atm in THF of the stationary points associated with the addition of the Breslow intermediate **29** to the  $\gamma$ -cetoenoate **6**.
- SI6** Complete citation for reference 22.
- SI7** B3LYP/6-31G\*\* computed total energies, unique frequency imaginary, and cartesian coordinates of the stationary points involved in the NHC catalyzed addition of the *E*-but-2-enal **12** to *E*-pent-3-en-2-one **13**, and the TSs **TS8 - TS12**.
- S25** MPWB1K/6-31G\*\* computed total energies, unique frequency imaginary, and cartesian coordinates of the TSs involved in the formation of the bicyclic lactone **22**.

**Table S1.** B3LYP/6-31G\*\* Enthalpies (H, in au) and free energies (G, in au) computed at 298.15 K and 1 atm in THF of the stationary points involved in the NHC catalyzed addition of the *E*-but-2-enal **12** to *E*-pent-3-en-2-one **13**.

|                                                     | H           | G           |
|-----------------------------------------------------|-------------|-------------|
| <i>i) Formation of the Breslow intermediate 17.</i> |             |             |
| <b>12</b>                                           | -231.154595 | -231.190527 |
| <b>14</b>                                           | -304.682703 | -304.721877 |
| <b>TS1</b>                                          | -535.831268 | -535.883501 |
| <b>16</b>                                           | -535.839072 | -535.893851 |
| <b>17</b>                                           | -535.846990 | -535.902672 |
| <i>ii) Formation of the bicyclic lactone 22.</i>    |             |             |
| <b>13</b>                                           | -270.453248 | -270.493207 |
| <b>TS2</b>                                          | -806.294859 | -806.364755 |
| <b>TS7</b>                                          | -806.290817 | -806.359396 |
| <b>18</b>                                           | -806.332212 | -806.402256 |
| <b>23</b>                                           | -806.332582 | -806.400716 |
| <b>19</b>                                           | -806.340523 | -806.410988 |
| <b>TS3</b>                                          | -806.312985 | -806.379329 |
| <b>TS4</b>                                          | -806.317794 | -806.382251 |
| <b>21</b>                                           | -806.328376 | -806.394127 |
| <b>TS5</b>                                          | -806.316922 | -806.383274 |
| <b>22+14</b>                                        | -806.331595 | -806.397977 |
| <i>iii) Formation of the trans-cyclopentene 15.</i> |             |             |
| <b>22</b>                                           | -501.648614 | -501.697236 |
| <b>TS6</b>                                          | -501.603903 | -501.655252 |
| <b>15+CO<sub>2</sub></b>                            | -501.665518 | -501.723415 |
| <b>15</b>                                           | -313.096689 | -313.140500 |

**Table S2.** MPWB1K/ 6-31G\*\* Total and relative enthalpies (H, in au, and  $\Delta H$ , in kcal/mol) and total and relative free energies (G, in au, and  $\Delta G$ , in kcal/mol) computed at 298.15 K and 1 atm in THF of the stationary points involved in the formation of the bicyclic lactone **22**.

|            | H           | $\Delta H$ | G           | $\Delta G$ |
|------------|-------------|------------|-------------|------------|
| <b>13</b>  | -270.297740 |            | -270.337201 |            |
| <b>14</b>  | -304.518189 |            | -304.556996 |            |
| <b>17</b>  | -535.561702 |            | -535.616406 |            |
| <b>TS2</b> | -805.853848 | 3.5        | -805.921845 | 19.9       |
| <b>TS7</b> | -805.851146 | 5.2        | -805.917988 | 22.4       |
| <b>18</b>  | -805.906739 | -29.7      | -805.974580 | -13.2      |
| <b>23</b>  | -805.906379 | -29.5      | -805.973878 | -12.7      |
| <b>19</b>  | -805.915132 | -34.9      | -805.983216 | -18.6      |
| <b>TS3</b> | -805.894694 | -22.1      | -805.958853 | -3.3       |
| <b>TS4</b> | -805.900255 | -25.6      | -805.963068 | -5.9       |
| <b>21</b>  | -805.917590 | -36.5      | -805.982892 | -18.4      |
| <b>TS5</b> | -805.902244 | -26.9      | -805.967408 | -8.7       |
| <b>22</b>  | -501.393244 | -32.6      | -501.441465 | -28.1      |

**Table S3.** B3LYP/6-31G\*\* Total energies (E, in au), in gas-phase and THF, of the TSs associated with nucleophilic addition of the Breslow intermediate **26** to the chalcone **10**.

|            | gas-phase    | THF          |
|------------|--------------|--------------|
| <b>TS8</b> | -1381.865684 | -1381.886985 |
| <b>TS9</b> | -1381.860981 | -1381.881644 |

**Table S4.** B3LYP/6-31G\*\* Enthalpies (H, in au) and free energies (G, in au) computed at 298.15 K and 1 atm in THF of the stationary points associated with the addition of the Breslow intermediate **29** to the  $\gamma$ -cetoenoate **6**.

|             | H            | G            |
|-------------|--------------|--------------|
| <b>6</b>    | -650.688090  | -650.739750  |
| <b>29</b>   | -727.549798  | -727.612609  |
| <b>TS10</b> | -1378.236398 | -1378.328203 |
| <b>TS11</b> | -1378.235338 | -1378.324300 |
| <b>TS12</b> | -1378.215438 | -1378.308702 |
| <b>30</b>   | -1378.257500 | -1378.350341 |
| <b>31</b>   | -1378.260580 | -1378.348595 |
| <b>32</b>   | -1378.214881 | -1378.310165 |

Complete citation for reference 22.

Frisch, M. J.; Trucks, G. W.; Schlegel, H. B.; Scuseria, G. E.; Robb, M. A.;  
Cheeseman, J. R.; Montgomery, J., J. A. ; Vreven, T.; Kudin, K. N.; Burant, J. C.;  
Millam, J. M.; Iyengar, S. S.; Tomasi, J.; Barone, V.; Mennucci, B.; Cossi, M.;  
Scalmani, G.; Rega, N.; Petersson, G. A.; Nakatsuji, H.; Hada, M.; Ehara, M.;  
Toyota, K.; Fukuda, R.; Hasegawa, J.; Ishida, M.; Nakajima, T.; Honda, Y.; Kitao,  
O.; Nakai, H.; Klene, M.; Li, X.; Knox, J. E.; Hratchian, H. P.; Cross, J. B.;  
Adamo, C.; Jaramillo, J.; Gomperts, R.; Stratmann, R. E.; Yazyev, O.; Austin, A.  
J.; Cammi, R.; Pomelli, C.; Ochterski, J. W.; Ayala, P. Y.; Morokuma, K.; Voth,  
G. A.; Salvador, P.; Dannenberg, J. J.; Zakrzewski, V. G.; Dapprich, S.; Daniels,  
A. D.; Strain, M. C.; Farkas, O.; Malick, D. K.; Rabuck, A. D.; Raghavachari, K.;  
Foresman, J. B.; Ortiz, J. V.; Cui, Q.; Baboul, A. G.; Clifford, S.; Cioslowski, J.;  
Stefanov, B. B.; Liu, G.; Liashenko, A.; Piskorz, P.; Komaromi, I.; Martin, R. L.;  
Fox, D. J.; Keith, T.; Al-Laham, M. A.; Peng, C. Y.; Nanayakkara, A.;  
Challacombe, M.; Gill, P. M. W.; Johnson, B.; Chen, W.; Wong, M. W.;  
Gonzalez, C.; Pople, J. A *Gaussian 03*, Revision C.02, Gaussian, Inc., Wallingford  
CT, **2004**.

B3LYP/6-31G\*\* computed total energies, unique frequency imaginary, and cartesian coordinates of the stationary points involved in the NHC catalyzed addition of the *E*-but-2-enal **12** to *E*-pent-3-en-2-one **13**, and the TSs **TS8** - **TS12**.

## 12

E(RB+HF-LYP) = -231.242910251 A.U.

|   |                 |                 |                 |
|---|-----------------|-----------------|-----------------|
| C | 0.000000000000  | 0.000000000000  | 0.000000000000  |
| C | 0.000000000000  | 0.000000000000  | 1.469158940000  |
| C | 1.148501698921  | 0.000000000000  | 2.163160135555  |
| C | 1.272705329250  | -0.000423504628 | 3.652814329763  |
| O | -1.002622400546 | -0.000110470529 | -0.689869266168 |
| H | -0.970785949353 | -0.000023718742 | 1.960071204626  |
| H | 2.084624785189  | 0.000071709295  | 1.601185347562  |
| H | 0.296389004223  | 0.002579266175  | 4.143848816720  |
| H | 1.831354178015  | -0.880689271314 | 3.994796313088  |
| H | 1.837219162811  | 0.875921243383  | 3.995059683488  |
| H | 1.014468995842  | 0.000111775806  | -0.462088425902 |

## 13

E(RB+HF-LYP) = -270.567923000 A.U.

|   |                 |                 |                 |
|---|-----------------|-----------------|-----------------|
| C | 0.000000000000  | 0.000000000000  | 0.000000000000  |
| C | 0.000000000000  | 0.000000000000  | 1.340908180000  |
| C | 1.226944483382  | 0.000000000000  | -0.858300617182 |
| C | -1.206019305198 | 0.000237630039  | 2.205226381024  |
| C | -2.586740630745 | -0.000737570554 | 1.565592184722  |
| H | -0.951466734922 | 0.000187473846  | -0.530973397223 |
| H | 0.936720521149  | -0.000152856749 | 1.895071138847  |
| H | 2.140880592639  | -0.000177157104 | -0.258808874936 |
| H | 1.243369057153  | 0.878711912345  | -1.515255727456 |
| H | 1.243229194197  | -0.878550508009 | -1.515490166752 |
| O | -1.078784782689 | 0.001010365015  | 3.421762972793  |
| H | -2.727124966441 | -0.884584097822 | 0.933902836047  |
| H | -3.336555459698 | 0.000221089087  | 2.357093980270  |
| H | -2.727628310441 | 0.881047916935  | 0.931186256128  |

## 14

E(RB+HF-LYP) = -304.803844949 A.U.

|   |                 |                 |                 |
|---|-----------------|-----------------|-----------------|
| C | 0.000000000000  | 0.000000000000  | 0.000000000000  |
| N | 0.000000000000  | 0.000000000000  | 1.372387410000  |
| N | 1.345186615202  | 0.000000000000  | -0.272549522598 |
| C | 1.278842873749  | 0.000000000000  | 1.921786506542  |
| C | -1.225106368259 | -0.000135565974 | 2.152173116719  |
| C | 2.137472148814  | -0.000204901019 | 0.871678943936  |
| C | 1.866098007129  | -0.000506528435 | -1.628152188880 |
| H | 1.467363469440  | 0.000068378732  | 2.984898760800  |
| H | -1.287200633829 | -0.889673519845 | 2.788343836198  |
| H | -2.057155186586 | -0.001631795009 | 1.448681401715  |
| H | -1.288721481287 | 0.890661221263  | 2.786422973194  |
| H | 3.216863083429  | 0.000277352718  | 0.845389715311  |

|   |                |                 |                 |
|---|----------------|-----------------|-----------------|
| H | 1.011304801693 | -0.000850485997 | -2.303813783835 |
| H | 2.476269391799 | -0.890673613928 | -1.815513540954 |
| H | 2.476052838257 | 0.889670301435  | -1.816298107711 |

## 15

E(RB+HF-LYP) = -313.2978995 A.U.

|   |                 |                 |                 |
|---|-----------------|-----------------|-----------------|
| C | 0.000000000000  | 0.000000000000  | 0.000000000000  |
| C | 0.000000000000  | 0.000000000000  | 1.338278110000  |
| C | 1.420232458291  | 0.000000000000  | 1.869595910160  |
| C | 2.279302653812  | -0.377239121865 | 0.636032236028  |
| C | -1.187552426566 | 0.053200464409  | 2.249819242197  |
| C | 1.392212608355  | -0.011410217703 | -0.592996540723 |
| C | 1.569337110640  | -0.954089774665 | -1.789680446463 |
| C | 3.677887397100  | 0.239526316642  | 0.619794527051  |
| H | -0.895708553626 | 0.039628717400  | -0.615962325613 |
| H | 1.647249221900  | 1.008355392017  | -0.930207576714 |
| H | 2.381528162747  | -1.471842366181 | 0.634056849054  |
| H | 1.564138765968  | -0.690937214225 | 2.710798167730  |
| H | 1.682343452054  | 1.000800164476  | 2.249575205105  |
| H | 1.298399579341  | -1.981175091436 | -1.520330778683 |
| H | 0.938147066787  | -0.651905252844 | -2.632690981376 |
| H | 2.607186408267  | -0.959421490246 | -2.141237813001 |
| H | 3.624344822118  | 1.334652576116  | 0.627112084325  |
| H | 4.261814957995  | -0.070122458222 | 1.493672668418  |
| H | 4.238572024293  | -0.060079507207 | -0.272727289639 |
| H | -2.127431957909 | 0.070774683244  | 1.690627834312  |
| H | -1.156726337715 | 0.945417774138  | 2.889264299397  |
| H | -1.208456306478 | -0.811605578724 | 2.925817163181  |

## 16

E(RB+HF-LYP) = -536.042346145 A.U.

|   |                 |                 |                 |
|---|-----------------|-----------------|-----------------|
| C | 0.000000000000  | 0.000000000000  | 0.000000000000  |
| C | 0.000000000000  | 0.000000000000  | 1.539228250000  |
| C | 1.093758955017  | 0.000000000000  | 2.308887868232  |
| C | 1.113860220813  | -0.160163857821 | 3.803471900073  |
| C | -0.710779353117 | 1.347029684495  | -0.424182949130 |
| O | -0.547675518576 | -1.064438928743 | -0.540990491951 |
| N | -1.944436201346 | 1.459928602442  | -0.955047767593 |
| N | -0.184174135358 | 2.596564802051  | -0.412246294912 |
| C | -2.198637863020 | 2.782348801050  | -1.281031788727 |
| C | -2.884385748611 | 0.342476390495  | -1.142083110273 |
| C | -1.094686619060 | 3.497334869392  | -0.942572330682 |
| C | 1.142800671537  | 2.931305066996  | 0.096361033873  |
| H | -0.985013686443 | -0.132281364862 | 1.990661221569  |
| H | 2.068532950290  | 0.079028257761  | 1.821688279276  |
| H | 0.101228043151  | -0.233281474787 | 4.211828801914  |
| H | 1.661569439840  | -1.064738421927 | 4.098757103304  |
| H | 1.617380867020  | 0.682297928132  | 4.296126319598  |
| H | -3.132941580654 | 3.089835235152  | -1.722370721892 |
| H | -3.707189860657 | 0.440614667940  | -0.428887203984 |
| H | -2.280708820256 | -0.563479279687 | -0.958444370322 |
| H | -3.275480276858 | 0.381246815382  | -2.161606732372 |
| H | -0.875603268855 | 4.549061336072  | -1.034528099159 |
| H | 1.243308338536  | 2.569859712783  | 1.121216798947  |
| H | 1.261722466764  | 4.014930777810  | 0.068109322601  |
| H | 1.913123050773  | 2.461488682104  | -0.520258078008 |
| H | 1.070251735724  | 0.218509484573  | -0.301971183915 |



17

E(RB+HF-LYP) = -536.062943000 A.U.

|   |                 |                 |                 |
|---|-----------------|-----------------|-----------------|
| C | 0.000000000000  | 0.000000000000  | 0.000000000000  |
| C | 0.000000000000  | 0.000000000000  | 1.437519890000  |
| C | 1.103624456800  | 0.000000000000  | 2.223485729503  |
| C | 1.078682652293  | -0.130662546929 | 3.718274533842  |
| C | -1.109110610633 | 0.107301544955  | -0.814839503385 |
| O | 1.235514202107  | -0.183578723766 | -0.638651814109 |
| N | -1.214259769920 | -0.257140212952 | -2.161091484659 |
| N | -2.354513583564 | 0.652094218472  | -0.475911819614 |
| C | -2.513799551328 | 0.011975196077  | -2.601081383439 |
| C | -0.346004434835 | -1.210384511560 | -2.831220617866 |
| C | -3.199750536031 | 0.576035495046  | -1.591116268856 |
| C | -2.586002647891 | 1.565734836332  | 0.627117173121  |
| H | -0.969643013469 | -0.093117727629 | 1.923082306946  |
| H | 2.081681058938  | 0.126291703998  | 1.761657819706  |
| H | 0.052975448526  | -0.202855195602 | 4.096484996970  |
| H | 1.619014689665  | -1.022638358885 | 4.067230510489  |
| H | 1.554667365227  | 0.727642215514  | 4.213304128283  |
| H | -2.820825326208 | -0.226551158641 | -3.606925754463 |
| H | -0.459306054250 | -2.220470080393 | -2.413033545316 |
| H | 0.693184745824  | -0.905591781622 | -2.725217402640 |
| H | -0.617935944256 | -1.238043085595 | -3.889013266868 |
| H | -4.209832486389 | 0.950731559096  | -1.552741452714 |
| H | -1.657645133752 | 2.096081106493  | 0.860016489608  |
| H | -2.927555626282 | 1.054668165525  | 1.534190815504  |
| H | -3.348615038295 | 2.292613102292  | 0.334466670615  |
| H | 1.691580254813  | -0.887841197002 | -0.149984127932 |

18

E(RB+HF-LYP) = -806.666118758 A.U.

|   |                 |                 |                 |
|---|-----------------|-----------------|-----------------|
| C | 0.000000000000  | 0.000000000000  | 0.000000000000  |
| C | 0.000000000000  | 0.000000000000  | 1.374420480000  |
| C | 1.317634882043  | 0.000000000000  | 2.102858128906  |
| C | 1.182458958332  | 0.382618782438  | 3.580890222006  |
| C | 2.103122804546  | -1.350757587781 | 1.865619675946  |
| C | 3.598550412510  | -1.141665943029 | 1.867676958848  |
| C | 1.675727605390  | -2.474265308532 | 2.818953646162  |
| C | 4.267491285066  | -0.564487732141 | 0.849844930503  |
| C | 5.757406805948  | -0.364697093120 | 0.844759821003  |
| C | -1.320395651859 | -0.071462775223 | -0.692270018786 |
| O | 1.023477745115  | 0.007707925260  | -0.788263849998 |
| N | -1.554753382099 | -0.756538291993 | -1.839528518019 |
| N | -2.480073882913 | 0.572879168220  | -0.387596618491 |
| C | -2.862945571739 | -0.561331181398 | -2.240868901747 |
| C | -0.594343120611 | -1.634399069692 | -2.518722704082 |
| C | -3.443153354318 | 0.267912241130  | -1.337185410549 |
| C | -2.685213552254 | 1.523993896351  | 0.702565616572  |
| H | -0.929288816859 | -0.092434848406 | 1.929380595103  |
| H | 1.935187233488  | 0.769425964433  | 1.622877136535  |
| H | 0.521957297506  | -0.303140278568 | 4.123913906889  |
| H | 2.158049132392  | 0.372320921986  | 4.077943187112  |
| H | 0.766138074370  | 1.391129332908  | 3.683686807915  |
| H | -3.259790141129 | -1.024861916606 | -3.129504571880 |
| H | -0.760213377794 | -2.671301831678 | -2.214109648641 |
| H | 0.402012015839  | -1.298528736319 | -2.225201742098 |
| H | -0.741091128261 | -1.540418305335 | -3.596334190134 |
| H | -4.438883209380 | 0.677960973557  | -1.291171051213 |

|   |                 |                 |                 |
|---|-----------------|-----------------|-----------------|
| H | -1.712529284848 | 1.905936213474  | 1.012918095700  |
| H | -3.160309121844 | 1.036407932574  | 1.557862697549  |
| H | -3.323159879773 | 2.334678034091  | 0.344301613982  |
| H | 1.821949801470  | -1.666504338293 | 0.853839661053  |
| H | 4.172082518110  | -1.463842800819 | 2.732818998311  |
| O | 3.716475710424  | -0.090492124413 | -0.296797255795 |
| H | 1.981803922001  | -2.272108349155 | 3.851635187688  |
| H | 2.136438070094  | -3.422586970935 | 2.522507048522  |
| H | 0.588251426581  | -2.611724199172 | 2.811568900432  |
| H | 6.217538602696  | -0.756091667082 | 1.754708699241  |
| H | 6.000626195253  | 0.700631719568  | 0.753780358391  |
| H | 6.204901513878  | -0.865958624632 | -0.021786653216 |
| H | 2.725326983887  | -0.125548188186 | -0.326034975609 |

## 19

E(RB+HF-LYP) = -806.675300400 A.U.

|   |                 |                 |                 |
|---|-----------------|-----------------|-----------------|
| C | 0.000000000000  | 0.000000000000  | 0.000000000000  |
| C | 0.000000000000  | 0.000000000000  | 1.521548760000  |
| C | 1.366358372019  | 0.000000000000  | 2.244046222453  |
| C | 2.017307518908  | -1.425240793702 | 2.273966770281  |
| C | 1.065945383644  | 0.808225272018  | -0.726347010484 |
| C | 1.745037021261  | -2.249872985485 | 1.041824777099  |
| C | 3.527163111490  | -1.337588143594 | 2.558060080184  |
| C | 0.668677013949  | -3.116594218082 | 1.010394172348  |
| C | 0.420578474832  | -3.839761815606 | -0.290257982600 |
| O | -0.194564412204 | -3.351108238725 | 1.914938358899  |
| N | -0.809313431349 | -4.038970761448 | -0.816288785794 |
| N | 1.296882293480  | -4.493464444553 | -1.097446126081 |
| C | -0.705788837500 | -4.796326852492 | -1.965217766475 |
| C | -2.063553344421 | -3.503364218900 | -0.263985919002 |
| C | 0.609394693898  | -5.085012757177 | -2.145187468933 |
| C | 2.734641069556  | -4.627556374128 | -0.879620616562 |
| H | 2.375933755442  | -2.121039826283 | 0.165676498643  |
| H | 1.533049594817  | -1.960605563858 | 3.101061817380  |
| H | 4.057173564927  | -0.873908185695 | 1.715502615194  |
| H | 3.752532101381  | -0.745535588036 | 3.451587623711  |
| H | 3.951140250152  | -2.336065984939 | 2.705395811624  |
| H | -0.610848407647 | -0.842559048577 | 1.859832653438  |
| O | -0.892481629561 | -0.535420045649 | -0.643652119337 |
| H | 2.041669802064  | 0.320886273285  | -0.638796831134 |
| H | 0.795590552471  | 0.887862561296  | -1.780487389409 |
| H | 1.166782688994  | 1.808841682292  | -0.290720787776 |
| H | -1.571329370275 | -5.062419147296 | -2.549785297487 |
| H | -2.048999382123 | -3.688044578106 | 0.809298548066  |
| H | -2.890693777905 | -4.012147759695 | -0.761368260458 |
| H | -2.099727965921 | -2.426854348136 | -0.440468659983 |
| H | 1.110552765505  | -5.659812310226 | -2.906876052313 |
| H | 2.946292337724  | -4.374474331614 | 0.159183382339  |
| H | 3.287780409762  | -3.944164831338 | -1.529655703413 |
| H | 3.031936025963  | -5.656284045209 | -1.095470065477 |
| H | -0.539020310390 | 0.922552918086  | 1.793985215782  |
| H | 2.048064344410  | 0.674670057423  | 1.705866437890  |
| C | 1.195933904924  | 0.557643589487  | 3.667681890905  |
| H | 2.136051016330  | 0.540789610640  | 4.227194968504  |
| H | 0.841215102926  | 1.594577499026  | 3.651275067309  |
| H | 0.465293221510  | -0.036831605345 | 4.228249694937  |

## 21

E(RB+HF-LYP) = -806.661577000 A.U.

|   |                 |                 |                 |
|---|-----------------|-----------------|-----------------|
| C | 0.000000000000  | 0.000000000000  | 0.000000000000  |
| C | 0.000000000000  | 0.000000000000  | 1.547304500000  |
| C | 1.488558493722  | 0.000000000000  | 1.949274980881  |
| C | 2.170076971460  | -0.878276529082 | 0.864080322751  |
| C | -0.430562175138 | 1.322673481573  | -0.618016345251 |
| C | 1.362080359183  | -0.592912307553 | -0.411771216118 |
| C | 3.677196345249  | -0.643401560669 | 0.737021857641  |
| C | 0.543330462177  | -1.843997067180 | -0.973556792660 |
| C | 0.530604442697  | -1.924597515707 | -2.534060480424 |
| O | 0.734390249783  | -3.026142978321 | -0.531030305666 |
| N | -0.486712932034 | -1.882716688478 | -3.424937422002 |
| N | 1.625671595424  | -2.323179593095 | -3.226097672702 |
| C | -0.024559106370 | -2.253908706966 | -4.680964307427 |
| C | -1.893057134399 | -1.560509476786 | -3.157263720411 |
| C | 1.297560744222  | -2.527225351727 | -4.554534216515 |
| C | 2.916019393615  | -2.641287056398 | -2.612120973420 |
| H | 1.918400345445  | -0.019304294725 | -1.163859682952 |
| H | 1.991946841751  | -1.936355648312 | 1.107968002540  |
| H | 3.896008728896  | 0.391687594474  | 0.444617475353  |
| H | 4.195252059169  | -0.836417686263 | 1.682964859187  |
| H | 4.125887026966  | -1.303144107556 | -0.014118586943 |
| H | -0.480511527748 | -0.925983658171 | 1.880677608480  |
| O | -0.742115908036 | -1.115595108266 | -0.554766127496 |
| H | 0.160409706514  | 2.154580473350  | -0.217249419302 |
| H | -0.304481223663 | 1.308402736595  | -1.706311515397 |
| H | -1.485585387289 | 1.524071317473  | -0.399187914762 |
| H | -0.677406493330 | -2.293326523988 | -5.537836222561 |
| H | -1.969638257407 | -1.243708802146 | -2.118122057456 |
| H | -2.503216524480 | -2.450594330493 | -3.330268560938 |
| H | -2.210798005651 | -0.762738764029 | -3.833483995415 |
| H | 2.026441960566  | -2.850037832937 | -5.280212584468 |
| H | 2.700069906369  | -3.095282151614 | -1.641975149731 |
| H | 3.519489467691  | -1.739020992688 | -2.486934134143 |
| H | 3.442338800067  | -3.344024979788 | -3.259562238040 |
| H | -0.553364790446 | 0.840931503176  | 1.981710897562  |
| H | 1.873141967984  | 1.027054735213  | 1.835189855302  |
| C | 1.744021680831  | -0.449725446310 | 3.388814283959  |
| H | 2.811153136325  | -0.431870987878 | 3.636245307365  |
| H | 1.230258314829  | 0.199393594071  | 4.106907743477  |
| H | 1.381027316946  | -1.472385702169 | 3.543596571432  |

## 22

E(RB+HF-LYP) = -501.859927200 A.U.

|   |                 |                 |                 |
|---|-----------------|-----------------|-----------------|
| C | 0.000000000000  | 0.000000000000  | 0.000000000000  |
| C | 0.000000000000  | 0.000000000000  | 1.538232220000  |
| C | 1.494174277973  | 0.000000000000  | 1.930529160259  |
| C | 2.164092193346  | -0.918782845283 | 0.870319621096  |
| C | -0.495105829013 | 1.262291735793  | -0.671243135548 |
| C | 1.357664547513  | -0.618387985304 | -0.418582168022 |
| C | 3.672998673124  | -0.723336749434 | 0.713495756331  |
| C | 0.490607431781  | -1.749005047834 | -0.968175801979 |
| O | 0.654700664862  | -2.793610621757 | -1.530045523502 |
| H | 1.931340145988  | -0.084490560025 | -1.181484162451 |
| H | 1.981771641768  | -1.961677039962 | 1.165113385155  |
| H | 3.906483513394  | 0.305089543533  | 0.413086832374  |
| H | 4.201262836606  | -0.927262878475 | 1.650329146207  |
| H | 4.079948120011  | -1.396210092879 | -0.047797763576 |
| H | -0.484024353290 | -0.917748446583 | 1.891533516502  |
| O | -0.699827141319 | -1.190358418032 | -0.568166240587 |

|   |                 |                 |                 |
|---|-----------------|-----------------|-----------------|
| H | 0.054194442094  | 2.132451472085  | -0.296493136319 |
| H | -0.364110236721 | 1.208999989946  | -1.755943978200 |
| H | -1.558382506639 | 1.414169863013  | -0.460749247705 |
| H | -0.548579382048 | 0.846357958051  | 1.963460450173  |
| H | 1.884319034276  | 1.018039855550  | 1.772835146208  |
| C | 1.757729786035  | -0.401103974872 | 3.381603496570  |
| H | 2.825489847515  | -0.372115725378 | 3.621261297400  |
| H | 1.246854818829  | 0.272582921885  | 4.077575815946  |
| H | 1.396875821279  | -1.417992150015 | 3.575852531993  |

### TS1

E(RB+HF-LYP) = -536.037986769 A.U.

1 imaginary frequencies -203.6544 cm<sup>-1</sup>

|   |                 |                 |                 |
|---|-----------------|-----------------|-----------------|
| C | 0.000000000000  | 0.000000000000  | 0.000000000000  |
| C | 0.000000000000  | 0.000000000000  | 1.512583530000  |
| C | 1.110524742898  | 0.000000000000  | 2.256517850303  |
| C | 1.163267824634  | -0.100837660849 | 3.754738028937  |
| C | -0.674923935543 | 1.769312920774  | -0.374306292436 |
| O | -0.700740970783 | -0.853969628616 | -0.610600252751 |
| N | -1.831765212901 | 1.992072426177  | -1.037331929469 |
| N | -0.027113566807 | 2.961894973762  | -0.394277737980 |
| C | -1.912460151274 | 3.308363244297  | -1.471554604526 |
| C | -2.876890602797 | 0.980836491346  | -1.225827798314 |
| C | -0.770000121355 | 3.922290565462  | -1.069979604975 |
| C | 1.292344173606  | 3.181984735845  | 0.186054662895  |
| H | -0.980206652424 | -0.099443147095 | 1.979328177770  |
| H | 2.074484730486  | 0.047641116631  | 1.743770810610  |
| H | 0.159796621412  | -0.148022024875 | 4.188341513660  |
| H | 1.711256219332  | -0.996942128909 | 4.073563589090  |
| H | 1.684478918130  | 0.756724321537  | 4.200416090989  |
| H | -2.765451512856 | 3.686595745091  | -2.012907726931 |
| H | -3.719496418924 | 1.189388261302  | -0.560158547352 |
| H | -2.426678461037 | 0.009295719142  | -0.998045674652 |
| H | -3.220895506331 | 1.010073117152  | -2.262668355037 |
| H | -0.428649624448 | 4.937320538796  | -1.200444965077 |
| H | 1.434480270541  | 2.474637900760  | 1.002579009267  |
| H | 1.351549922465  | 4.200725501293  | 0.575517639094  |
| H | 2.077647920740  | 3.036898728127  | -0.562047182539 |
| H | 1.025274110235  | 0.239327458415  | -0.384832770366 |

### TS2

E(RB+HF-LYP) = -806.630519054 A.U.

1 imaginary frequencies -311.4344 cm<sup>-1</sup>

|   |                |                |                |
|---|----------------|----------------|----------------|
| C | 0.000000000000 | 0.000000000000 | 0.000000000000 |
| C | 0.000000000000 | 0.000000000000 | 1.398838930000 |
| C | 1.165360536706 | 0.000000000000 | 2.176485576241 |
| C | 1.123037498376 | 0.382015414048 | 3.636233588850 |

|   |                  |                 |                 |
|---|------------------|-----------------|-----------------|
| C | 1.678004295757   | -2.169403099410 | 2.069719069037  |
| C | 3.019748188121   | -2.269567799618 | 1.676130668511  |
| C | 1.233478409548   | -2.695371672771 | 3.410325764981  |
| C | 3.396784261672   | -2.179978353224 | 0.318932302507  |
| C | 4.846554507417   | -2.409884668417 | -0.071668367081 |
| C | -1.157583091714  | -0.231785826316 | -0.793011318795 |
| O | 1.154262643520   | 0.170119023484  | -0.709981268056 |
| N | -1.155847739818  | -0.786664071360 | -2.051294013878 |
| N | -2.472716741403  | 0.080674127856  | -0.520476646428 |
| C | -2.453030639638  | -0.827851237635 | -2.537558102151 |
| C | -0.006719157683  | -1.410082750281 | -2.709252018639 |
| C | -3.268799468605  | -0.298439835896 | -1.596935934269 |
| C | -2.943709479726  | 0.868039432671  | 0.605821107381  |
| H | -0.945794576234  | -0.174704010881 | 1.909243311776  |
| H | 2.070050500593   | 0.292004308884  | 1.653164636814  |
| H | 0.209978254452   | 0.028550756736  | 4.129339579758  |
| H | 1.978125179062   | -0.021817345784 | 4.189296621151  |
| H | 1.154041279973   | 1.473818765351  | 3.761030801478  |
| H | -2.678397377563  | -1.237293311447 | -3.508818924197 |
| H | 0.511773270378   | -2.080184626047 | -2.018869537522 |
| H | 0.704063087710   | -0.652597403022 | -3.037117200723 |
| H | -0.3827477711421 | -1.975569098420 | -3.563846556236 |
| H | -4.335470009693  | -0.145044039984 | -1.594067078650 |
| H | -2.164148693198  | 1.577211427972  | 0.893204467031  |
| H | -3.184609400377  | 0.241269812642  | 1.470541432653  |
| H | -3.840434429257  | 1.412997654069  | 0.303397277423  |
| H | 0.963685013553   | -2.301144851900 | 1.262566732941  |
| H | 3.795883729630   | -2.397443131648 | 2.427275131958  |
| O | 2.580058490845   | -1.921895965997 | -0.626004169650 |
| H | 1.923582780921   | -2.412774859756 | 4.211568152050  |
| H | 1.204975427879   | -3.793186094120 | 3.381769878336  |
| H | 0.231803481562   | -2.350545244212 | 3.682275769975  |
| H | 5.480343732675   | -2.676854989900 | 0.778184924411  |
| H | 5.248895137170   | -1.506691159084 | -0.545139440683 |
| H | 4.899407877383   | -3.208215734185 | -0.820063230525 |
| H | 1.765267392530   | -0.641971218415 | -0.598828107029 |

### TS3

E(RB+HF-LYP) = -806.645428876 A.U.

1 imaginary frequencies -401.9744 cm<sup>-1</sup>

|   |                |                 |                 |
|---|----------------|-----------------|-----------------|
| C | 0.000000000000 | 0.000000000000  | 0.000000000000  |
| C | 0.000000000000 | 0.000000000000  | 1.551682310000  |
| C | 1.445354613901 | 0.000000000000  | 2.064248838762  |
| C | 2.218577649836 | -1.006662810154 | 1.150558668670  |
| C | 0.516065407720 | 1.341458990816  | -0.576146155352 |
| C | 1.417717174647 | -1.137179308110 | -0.146991325200 |
| C | 3.683677683346 | -0.609849914867 | 0.933547921636  |

|   |                 |                 |                 |
|---|-----------------|-----------------|-----------------|
| C | 0.721582444380  | -2.399302245626 | -0.326215835698 |
| C | -0.156916721643 | -2.549418415822 | -1.565672254116 |
| O | 0.620203976114  | -3.321394599860 | 0.484600502804  |
| N | -1.394803056580 | -3.083413076522 | -1.545270105019 |
| N | 0.205191931167  | -2.433473337083 | -2.862369429249 |
| C | -1.849265673568 | -3.226080399275 | -2.836720797518 |
| C | -2.232031736828 | -3.161196043268 | -0.342880639083 |
| C | -0.849130486722 | -2.832954817003 | -3.667996450573 |
| C | 1.472372850752  | -1.922111995016 | -3.381751291022 |
| H | 1.913277310911  | -0.771499646958 | -1.045841297715 |
| H | 2.197797955983  | -1.983640679956 | 1.649496956399  |
| H | 3.761850180082  | 0.335071877008  | 0.381661063237  |
| H | 4.204626521381  | -0.475053150615 | 1.888340195192  |
| H | 4.228504248014  | -1.374064374912 | 0.367327814340  |
| H | -0.517754373226 | -0.909524665440 | 1.883436529374  |
| O | -1.062720328588 | -0.435105532744 | -0.623502907699 |
| H | 1.478371351087  | 1.680049411023  | -0.175652628183 |
| H | 0.596182087445  | 1.255765630037  | -1.665054074498 |
| H | -0.235637560873 | 2.111776863190  | -0.366332290682 |
| H | -2.839137886090 | -3.593279076075 | -3.052730521868 |
| H | -1.780296125406 | -3.848231398189 | 0.369795653925  |
| H | -3.221059739374 | -3.510229271459 | -0.641320909745 |
| H | -2.260310162132 | -2.139955666476 | 0.055542238940  |
| H | -0.784641603855 | -2.815541347729 | -4.743379056569 |
| H | 2.293035805201  | -2.242635594029 | -2.742150767803 |
| H | 1.448705162180  | -0.831023761863 | -3.429161214221 |
| H | 1.622007259239  | -2.329307527543 | -4.382451895128 |
| H | -0.576633659113 | 0.855637474506  | 1.927132424818  |
| H | 1.869910012033  | 1.001329231969  | 1.901957549326  |
| C | 1.574815118564  | -0.325419776716 | 3.555020442745  |
| H | 2.623117471679  | -0.347005953914 | 3.875755171195  |
| H | 1.057301598349  | 0.417348002794  | 4.172422098154  |
| H | 1.138659087695  | -1.306398076682 | 3.777285572102  |

#### TS4

E(RB+HF-LYP) = -806.652940200 A.U.

1 imaginary frequencies -84.3096 cm<sup>-1</sup>

|   |                 |                 |                 |
|---|-----------------|-----------------|-----------------|
| C | 0.000000000000  | 0.000000000000  | 0.000000000000  |
| C | 0.000000000000  | 0.000000000000  | 1.557555820000  |
| C | 1.480967103586  | 0.000000000000  | 1.971045435264  |
| C | 2.130471480295  | -0.954461307291 | 0.936756333177  |
| C | -0.222854436692 | 1.414305642726  | -0.553105180440 |
| C | 1.361398734068  | -0.655990345126 | -0.367044793039 |
| C | 3.651019857983  | -0.835123498787 | 0.812720373662  |
| C | 0.759229340647  | -1.916792739480 | -1.038676544041 |
| C | 0.148274509818  | -1.805699079104 | -2.414168763509 |
| O | 0.938854898586  | -3.066625468252 | -0.625094075189 |

|   |                 |                 |                 |
|---|-----------------|-----------------|-----------------|
| N | -0.881276566515 | -2.592729858065 | -2.802359916472 |
| N | 0.544615554487  | -1.114768756720 | -3.511981125249 |
| C | -1.179964296437 | -2.345463337007 | -4.127278833896 |
| C | -1.653749886550 | -3.447427159135 | -1.895302404829 |
| C | -0.294737849973 | -1.423928019789 | -4.579216209515 |
| C | 1.695325551176  | -0.222124140213 | -3.626477523193 |
| H | 1.983329858295  | -0.064212265639 | -1.049059870373 |
| H | 1.886865100223  | -1.984639056407 | 1.226219524348  |
| H | 3.947288591514  | 0.174169365691  | 0.498377549568  |
| H | 4.151721730220  | -1.044487879230 | 1.764361627045  |
| H | 4.043716386300  | -1.545904071221 | 0.076861841873  |
| H | -0.477810008145 | -0.931559718475 | 1.882681340791  |
| O | -0.901466569006 | -0.917462370165 | -0.565571675249 |
| H | 0.468649574994  | 2.149642317586  | -0.122183130132 |
| H | -0.107851204299 | 1.429595600066  | -1.643773394290 |
| H | -1.246252495836 | 1.734882195805  | -0.330507950995 |
| H | -1.993771895011 | -2.843874545937 | -4.628124915458 |
| H | -1.870372512194 | -2.862148082480 | -1.001468254353 |
| H | -1.065607243037 | -4.324106205000 | -1.625886210814 |
| H | -2.572630850726 | -3.736593761073 | -2.407269479362 |
| H | -0.174352564517 | -0.968466866874 | -5.548152675163 |
| H | 1.497096238955  | 0.737832963559  | -3.145334870399 |
| H | 1.891342300048  | -0.059276949314 | -4.686676608060 |
| H | 2.575577210526  | -0.679804608658 | -3.174367666095 |
| H | -0.566491247542 | 0.833434925860  | 1.989571449195  |
| H | 1.889926561823  | 1.010437973788  | 1.804180247115  |
| C | 1.729116674687  | -0.381479568549 | 3.431308470501  |
| H | 2.796755255445  | -0.383125509182 | 3.678252851597  |
| H | 1.235854098402  | 0.319130151746  | 4.114325217600  |
| H | 1.335717200273  | -1.383184378145 | 3.641508093333  |

## TS5

E(RB+HF-LYP) = -806.653372817 A.U.

1 imaginary frequencies -197.7720 cm<sup>-1</sup>

|   |                 |                 |                 |
|---|-----------------|-----------------|-----------------|
| C | 0.000000000000  | 0.000000000000  | 0.000000000000  |
| C | 0.000000000000  | 0.000000000000  | 1.544557780000  |
| C | 1.490189494837  | 0.000000000000  | 1.947355890805  |
| C | 2.173766672420  | -0.875127600260 | 0.861808510503  |
| C | -0.493399611519 | 1.289881194802  | -0.633885946585 |
| C | 1.378728004961  | -0.558410319539 | -0.422977810874 |
| C | 3.682439562951  | -0.653344687601 | 0.733279026801  |
| C | 0.570118269238  | -1.750861058812 | -1.010957948084 |
| C | 0.472925389554  | -1.418699820095 | -2.975640197139 |
| O | 0.806174269313  | -2.955056002860 | -0.941512335921 |
| N | -0.596609451346 | -1.299526838857 | -3.802883637200 |
| N | 1.465931808427  | -1.887200566233 | -3.775174508870 |
| C | -0.275027211010 | -1.675442105023 | -5.101897917537 |

|   |                 |                 |                 |
|---|-----------------|-----------------|-----------------|
| C | -1.925700173637 | -0.855337893388 | -3.387403476965 |
| C | 1.029760208675  | -2.047796963133 | -5.082295597208 |
| C | 2.790745653984  | -2.258246397219 | -3.282180753312 |
| H | 1.940626607990  | 0.035055702110  | -1.148518501631 |
| H | 1.998906047052  | -1.931322566038 | 1.108347738254  |
| H | 3.906853486649  | 0.384659121761  | 0.457151442795  |
| H | 4.203278180669  | -0.868141505244 | 1.672651036177  |
| H | 4.114345578849  | -1.304448654508 | -0.034428433451 |
| H | -0.484209906508 | -0.921641991026 | 1.886275271151  |
| O | -0.684953323970 | -1.176266291290 | -0.550063748652 |
| H | 0.051513758097  | 2.150579557442  | -0.229422368610 |
| H | -0.350494900412 | 1.274790901960  | -1.718262386258 |
| H | -1.558685945527 | 1.439700581085  | -0.424697561073 |
| H | -0.992552615332 | -1.654339601106 | -5.907058802971 |
| H | -1.961945297761 | -0.880837008639 | -2.299182764071 |
| H | -2.678418281129 | -1.531835970237 | -3.800103606259 |
| H | -2.120825413865 | 0.159478860238  | -3.748151953156 |
| H | 1.671949029210  | -2.413672722315 | -5.868012524676 |
| H | 2.660799695751  | -2.776495587785 | -2.330283311643 |
| H | 3.419358525074  | -1.373143910380 | -3.148872383465 |
| H | 3.263573796380  | -2.924170490166 | -4.006149596412 |
| H | -0.551191845694 | 0.843956374912  | 1.974503073936  |
| H | 1.872512313742  | 1.027206751619  | 1.830262606829  |
| C | 1.747631461042  | -0.447584595845 | 3.386700366252  |
| H | 2.815165806448  | -0.429512655313 | 3.631032886931  |
| H | 1.235689912970  | 0.202766341304  | 4.104641141950  |
| H | 1.384855858279  | -1.470004917905 | 3.544693948462  |

## TS6

E(RB+HF-LYP) = -501.806719855 A.U.

1 imaginary frequencies -716.7096 cm<sup>-1</sup>

|   |                 |                 |                 |
|---|-----------------|-----------------|-----------------|
| C | 0.000000000000  | 0.000000000000  | 0.000000000000  |
| C | 0.000000000000  | 0.000000000000  | 1.500463720000  |
| C | 1.502156011466  | 0.000000000000  | 1.884879400074  |
| C | 2.230687881472  | -0.674457957246 | 0.678643768722  |
| C | -1.006675689978 | 0.726766466726  | -0.808056351068 |
| C | 1.216723065907  | -0.580481798412 | -0.478947275461 |
| C | 3.585338555885  | -0.037468480037 | 0.357513388693  |
| C | 0.463923720154  | -2.112147322194 | -0.750580881420 |
| O | 1.222087856233  | -3.003379166634 | -1.055682249830 |
| H | 1.582891126683  | -0.262163140744 | -1.456125185162 |
| H | 2.403118197389  | -1.734168924279 | 0.904174381622  |
| H | 3.471704629276  | 1.015152727272  | 0.071881463636  |
| H | 4.254985324004  | -0.079572384006 | 1.223536901198  |
| H | 4.079273199419  | -0.560735616114 | -0.467317001769 |
| H | -0.505121896807 | -0.913921508542 | 1.837912607449  |
| O | -0.769912364985 | -2.017087487765 | -0.538219559043 |



|   |                 |                 |                 |
|---|-----------------|-----------------|-----------------|
| H | -0.776801875207 | 1.801002165296  | -0.724045518206 |
| H | -0.964218833096 | 0.445294737599  | -1.860450849307 |
| H | -2.018121612534 | 0.574125135452  | -0.425265139385 |
| H | -0.567671348306 | 0.843208220144  | 1.909388304732  |
| H | 1.828845910409  | 1.049144397456  | 1.919511111601  |
| C | 1.795117235617  | -0.643076817414 | 3.240635353630  |
| H | 2.867423048611  | -0.626937156425 | 3.461196628378  |
| H | 1.283447428654  | -0.117177474984 | 4.053868944061  |
| H | 1.466304219558  | -1.688295820197 | 3.255436950751  |

## TS7

E(RB+HF-LYP) = -806.623828807 A.U.

1 imaginary frequencies -353.4576 cm<sup>-1</sup>

|   |                 |                 |                 |
|---|-----------------|-----------------|-----------------|
| C | 0.000000000000  | 0.000000000000  | 0.000000000000  |
| C | 0.000000000000  | 0.000000000000  | 1.402418600000  |
| C | 1.188746662304  | 0.000000000000  | 2.157861414891  |
| C | 1.168586060484  | -0.565292390660 | 3.557759273491  |
| C | 2.045917802511  | 2.018659417827  | 2.508531034902  |
| C | -1.325038822043 | -0.069931457803 | -0.743439554592 |
| C | 1.403447245753  | 2.886593959773  | 1.606640583180  |
| C | 1.951122758746  | 2.369342728917  | 3.980840813982  |
| C | 1.597760791836  | 2.902163803333  | 0.229416033951  |
| C | 0.921237276233  | 3.797163146304  | -0.659057037569 |
| O | 2.466922333565  | 2.042843332382  | -0.369251594430 |
| N | 0.774676307944  | 3.619514853436  | -2.014218947887 |
| N | 0.344369103987  | 5.017473804707  | -0.378314777361 |
| C | 0.111653903904  | 4.708400052053  | -2.552880822767 |
| C | 1.223427973363  | 2.477345774684  | -2.825007255922 |
| C | -0.163687827803 | 5.570315374907  | -1.547635633416 |
| C | 0.408962033561  | 5.743260593313  | 0.881218392581  |
| H | 0.596408231269  | 3.495690510665  | 2.006839254041  |
| H | 3.014145084078  | 1.651209775352  | 2.176440260647  |
| H | 0.914997188694  | 2.565547666153  | 4.283056155771  |
| H | 2.334349686279  | 1.577295260610  | 4.627665135982  |
| H | 2.532081471388  | 3.273167562457  | 4.216937229401  |
| H | 2.072579166673  | -0.251202551868 | 1.577437647478  |
| H | -0.957855087086 | 0.024962408104  | 1.917815565072  |
| H | 0.390381600415  | -0.107193566217 | 4.177263863828  |
| H | 2.126670237225  | -0.456816062772 | 4.071518368364  |
| H | 0.950208618341  | -1.640537498889 | 3.507214715143  |
| O | 1.062013497082  | 0.008566735184  | -0.723074851593 |
| H | -1.467037542228 | 0.829124093251  | -1.355686195304 |
| H | -1.308802527807 | -0.921635680296 | -1.432329221360 |
| H | -2.182976789582 | -0.171924113059 | -0.073377138450 |
| H | 2.003960118042  | 1.118777179054  | -0.436019735669 |
| H | -0.113783809052 | 4.764863418988  | -3.605220483050 |
| H | 2.306216606623  | 2.507319801306  | -2.950440330979 |

|   |                 |                |                 |
|---|-----------------|----------------|-----------------|
| H | 0.733202377506  | 2.563894849374 | -3.796807690385 |
| H | 0.952857505052  | 1.533991530681 | -2.350011004704 |
| H | -0.670243075897 | 6.521389610097 | -1.550605218787 |
| H | 1.363078403406  | 5.535043885130 | 1.369359072041  |
| H | -0.403080309706 | 5.459245819609 | 1.557085562368  |
| H | 0.333790224357  | 6.811207021893 | 0.667123196163  |

### TS8

E(RB+HF-LYP) = -1381.86568405 A.U.

1 imaginary frequencies - 365.6214 cm<sup>-1</sup>

|   |                 |                 |                 |
|---|-----------------|-----------------|-----------------|
| C | 0.000000000000  | 0.000000000000  | 0.000000000000  |
| C | 0.000000000000  | 0.000000000000  | 1.381546300000  |
| C | 1.208745078045  | 0.000000000000  | 2.144684556368  |
| C | 1.743904086903  | -2.020816549566 | 2.114235305379  |
| C | 3.091013061050  | -2.113070326111 | 1.651150150529  |
| C | 3.381963216851  | -2.091942792115 | 0.287513919297  |
| C | -1.202678919751 | -0.205925431831 | -0.772080253878 |
| O | 1.114490175430  | 0.130495562856  | -0.744904353661 |
| N | -1.248582268371 | -0.853648491427 | -1.972944682051 |
| N | -2.476137365122 | 0.225888447616  | -0.517508030077 |
| C | -2.545160459646 | -0.834839624598 | -2.454090140390 |
| C | -0.131232274688 | -1.554978801031 | -2.616028080873 |
| C | -3.310759580841 | -0.171381699257 | -1.552886039923 |
| C | -2.887986885449 | 1.080659490168  | 0.588879559159  |
| H | -0.944211850513 | -0.156868873620 | 1.895055125316  |
| H | 2.069580665492  | 0.319736032076  | 1.566178421377  |
| H | -2.807972293763 | -1.298679501769 | -3.390781352009 |
| H | 0.410705089446  | -2.159123109237 | -1.885473079824 |
| H | 0.567913389534  | -0.836560181848 | -3.041908825414 |
| H | -0.549767562942 | -2.193507905476 | -3.395458804063 |
| H | -4.362701141887 | 0.062591642347  | -1.556531734526 |
| H | -2.043080216606 | 1.702900676580  | 0.887952180185  |
| H | -3.215059385579 | 0.489807289178  | 1.449194952398  |
| H | -3.712567328488 | 1.712584799853  | 0.253886222262  |
| H | 1.025522963837  | -2.258384000334 | 1.334712333396  |
| H | 3.901933849632  | -2.190163169096 | 2.365711429855  |
| O | 2.477122615083  | -1.885355417079 | -0.621857712275 |
| H | 1.762012303937  | -0.715200844922 | -0.619436932699 |
| C | 4.779939987023  | -2.311705931246 | -0.199623932740 |
| C | 5.779322302991  | -2.919032300050 | 0.579759160595  |
| C | 5.107320591774  | -1.912724751146 | -1.505676770875 |
| C | 7.066605031776  | -3.098707752817 | 0.077271918855  |
| H | 5.542913810252  | -3.277987661291 | 1.576180519571  |
| C | 6.394598932444  | -2.089247100648 | -2.007776848297 |
| H | 4.326751038810  | -1.464141587036 | -2.109832138724 |
| C | 7.382441600328  | -2.680689445139 | -1.217508444149 |
| H | 7.823136302383  | -3.575773428582 | 0.694498638797  |

|   |                 |                 |                 |
|---|-----------------|-----------------|-----------------|
| H | 6.629082288375  | -1.765499631869 | -3.018485491309 |
| H | 8.386152421794  | -2.822415148989 | -1.608501637489 |
| C | 1.355692932367  | -2.557705118137 | 3.439098283250  |
| C | 0.090600372959  | -3.149881398579 | 3.596846182620  |
| C | 2.201096627932  | -2.509028397020 | 4.561367934148  |
| C | -0.312281115236 | -3.685052662713 | 4.819451909038  |
| H | -0.575867090656 | -3.202258065798 | 2.739107787771  |
| C | 1.800416557235  | -3.041307848814 | 5.784577790756  |
| H | 3.175771239876  | -2.039879973385 | 4.478566434435  |
| C | 0.543342946691  | -3.634383214757 | 5.920876977186  |
| H | -1.291163475092 | -4.148446447884 | 4.910273144604  |
| H | 2.471898943912  | -2.990435572421 | 6.637111364042  |
| H | 0.234791298952  | -4.051848385720 | 6.875030712012  |
| C | 1.237250106436  | 0.491342666363  | 3.538085690388  |
| C | 0.144352738619  | 0.398400981976  | 4.420143068454  |
| C | 2.421618680599  | 1.071507806012  | 4.030167407074  |
| C | 0.229472418311  | 0.874854629430  | 5.726117785042  |
| H | -0.779986878082 | -0.065631557661 | 4.089609938495  |
| C | 2.508660608691  | 1.547161546022  | 5.337129391008  |
| H | 3.279468112512  | 1.153978967188  | 3.367639117868  |
| C | 1.410628355951  | 1.455021462472  | 6.194034745594  |
| H | -0.630650881070 | 0.788345849780  | 6.384734252831  |
| H | 3.435161105374  | 1.996419569811  | 5.684666176624  |
| H | 1.473992392177  | 1.827698994970  | 7.212216225633  |

## TS9

E(RB+HF-LYP) = -1381.86098094 A.U.

1 imaginary frequencies - 399.4748 cm<sup>-1</sup>

|   |                 |                 |                 |
|---|-----------------|-----------------|-----------------|
| C | 0.000000000000  | 0.000000000000  | 0.000000000000  |
| C | 0.000000000000  | 0.000000000000  | 1.391879150000  |
| C | 1.219248498798  | 0.000000000000  | 2.129580904299  |
| C | 1.935084639674  | 1.954811431435  | 2.541570684805  |
| C | 1.488664136410  | 2.851262650450  | 1.519061033463  |
| C | 1.852389968635  | 2.802092856474  | 0.190502364475  |
| C | 1.417473452342  | 3.818061718170  | -0.748170566953 |
| O | 2.617232370373  | 1.829986713735  | -0.338880197463 |
| N | 1.267945537301  | 3.640145625515  | -2.093143032419 |
| N | 1.140775059267  | 5.138341052838  | -0.505059003847 |
| C | 0.888635451059  | 4.833572015019  | -2.676129734444 |
| C | 1.450973913123  | 2.392297778235  | -2.850698107854 |
| C | 0.800979530225  | 5.764172164379  | -1.694695232956 |
| C | 1.313977586329  | 5.855310108625  | 0.754848828747  |
| H | 0.739862396880  | 3.584950939749  | 1.801339821744  |
| H | 2.956505570276  | 1.607359620837  | 2.403601852810  |
| H | 2.080440324191  | -0.202318574336 | 1.498701086445  |
| H | -0.947980986056 | -0.048661073634 | 1.914207789267  |
| O | 1.085251755866  | -0.024049003920 | -0.721530969260 |

|   |                 |                 |                 |
|---|-----------------|-----------------|-----------------|
| H | 2.017463477585  | 0.936805815349  | -0.435803938902 |
| H | 0.704951520673  | 4.911037074106  | -3.735223751271 |
| H | 2.514272578771  | 2.205727374002  | -3.005390743462 |
| H | 0.946573070328  | 2.520580167967  | -3.809691692275 |
| H | 1.023723535742  | 1.547781311358  | -2.310444916290 |
| H | 0.533526439849  | 6.807407063096  | -1.731490609253 |
| H | 2.115329153835  | 5.385769432598  | 1.326127549540  |
| H | 0.399006205567  | 5.841346103156  | 1.352661080739  |
| H | 1.577781748193  | 6.889789564629  | 0.527079644672  |
| C | -1.293207423147 | -0.056494402163 | -0.754107707511 |
| C | -1.293961955413 | -0.586360997254 | -2.055643339030 |
| C | -2.510799300731 | 0.404934604574  | -0.225621855911 |
| C | -2.471451180670 | -0.667677954134 | -2.796207904639 |
| H | -0.352607549403 | -0.940235715627 | -2.461858598255 |
| C | -3.688110849145 | 0.329464032649  | -0.968156869753 |
| H | -2.533003387394 | 0.847475125483  | 0.765244578520  |
| C | -3.675511605744 | -0.209898224409 | -2.256416956053 |
| H | -2.451613667857 | -1.093145566580 | -3.796217447907 |
| H | -4.617288780152 | 0.698919950067  | -0.542453681058 |
| H | -4.593984999772 | -0.270238639825 | -2.833543316242 |
| C | 1.318413541791  | -0.649547839748 | 3.455774304753  |
| C | 0.243698653102  | -0.723096798923 | 4.359695068089  |
| C | 2.536818109278  | -1.238839681160 | 3.837202732195  |
| C | 0.382994768394  | -1.365012382524 | 5.587726446935  |
| H | -0.707736970721 | -0.269616569651 | 4.102776214051  |
| C | 2.677144583741  | -1.885650356100 | 5.063622419135  |
| H | 3.378775157448  | -1.198412762785 | 3.150282847769  |
| C | 1.598411664542  | -1.952077334046 | 5.946506298073  |
| H | -0.462354039260 | -1.408433523272 | 6.268933244881  |
| H | 3.627369486306  | -2.342105248890 | 5.327191404962  |
| H | 1.702225734478  | -2.455782463333 | 6.903257991603  |
| C | 1.594315780044  | 2.309573655088  | 3.935793975442  |
| C | 0.320266201047  | 2.794618473795  | 4.291756449315  |
| C | 2.540825672641  | 2.156912885598  | 4.965277477698  |
| C | 0.017969245516  | 3.135359636959  | 5.608782611482  |
| H | -0.450091521535 | 2.883792106529  | 3.529871381472  |
| C | 2.238063556984  | 2.491832751314  | 6.283217086305  |
| H | 3.527461249018  | 1.773327220972  | 4.721002726639  |
| C | 0.976058064886  | 2.989397877117  | 6.613975234646  |
| H | -0.974182772789 | 3.506089845411  | 5.853463176087  |
| H | 2.992374205944  | 2.365957361254  | 7.055232744139  |
| H | 0.739853625704  | 3.251901284021  | 7.641046636118  |

### TS10

E(RB+HF-LYP) = -1378.68763425A.U.

1 imaginary frequencies -311.1710 cm<sup>-1</sup>

|   |                |                |                |
|---|----------------|----------------|----------------|
| C | 0.000000000000 | 0.000000000000 | 0.000000000000 |
|---|----------------|----------------|----------------|

|   |                 |                 |                 |
|---|-----------------|-----------------|-----------------|
| C | 0.000000000000  | 0.000000000000  | 1.381523950000  |
| C | 1.202987614770  | 0.000000000000  | 2.148169994845  |
| C | 1.741896587630  | -2.056960660667 | 2.022127078185  |
| C | 3.068231551908  | -2.209443390768 | 1.554334590063  |
| C | 1.340446030972  | -2.495512197299 | 3.380594560619  |
| C | 3.339258826827  | -2.206979804162 | 0.179371935437  |
| O | 2.369493968676  | -2.501783846034 | 4.259918566619  |
| C | 2.026656711649  | -2.870321177881 | 5.602779379448  |
| C | -1.206393883830 | -0.186514302934 | -0.771247286701 |
| O | 1.120291499964  | 0.116091372527  | -0.742728356733 |
| N | -1.264801705975 | -0.819848918999 | -1.979294539485 |
| N | -2.476061948539 | 0.246195714259  | -0.500703400389 |
| C | -2.565658476612 | -0.792288958454 | -2.448024619136 |
| C | -0.158626003933 | -1.520969574906 | -2.641581349270 |
| C | -3.320834198967 | -0.137175353074 | -1.532268699817 |
| C | -2.881170508496 | 1.084616009768  | 0.621190746088  |
| H | -0.942514364811 | -0.156072303244 | 1.896297117018  |
| H | 2.077339219675  | 0.312043533331  | 1.586196987391  |
| H | 0.968303650878  | -2.274002883276 | 1.295637578614  |
| H | 3.873981204131  | -2.288761520567 | 2.272545514612  |
| O | 0.201430541242  | -2.798860910175 | 3.692288813786  |
| O | 2.428741355503  | -1.959687334493 | -0.706084604152 |
| H | 1.731994174636  | -0.745157693314 | -0.651263624126 |
| H | -2.838408938620 | -1.245355616817 | -3.387081268493 |
| H | 0.550875358406  | -0.802212723751 | -3.049208794981 |
| H | 0.373379492948  | -2.154243722646 | -1.928637372973 |
| H | -0.587473310307 | -2.131061180785 | -3.437810643152 |
| H | -4.372250697798 | 0.098852117325  | -1.522879007895 |
| H | -2.038012405704 | 1.709286819791  | 0.919450259382  |
| H | -3.712731610006 | 1.715276740223  | 0.301563525812  |
| H | -3.196111940749 | 0.480171361441  | 1.476342786570  |
| H | 2.962094712577  | -2.845427812524 | 6.162228043999  |
| H | 1.591261363025  | -3.872687219137 | 5.629812340132  |
| H | 1.311875550382  | -2.159892251731 | 6.023962921472  |
| C | 1.220351526706  | 0.441891229970  | 3.557896794549  |
| C | 0.120207887375  | 0.307130679957  | 4.427341403858  |
| C | 2.394712239657  | 1.020596953160  | 4.076187903545  |
| C | 0.189836014340  | 0.750132672349  | 5.747125557421  |
| H | -0.789474813944 | -0.170049321049 | 4.078683253349  |
| C | 2.464682899900  | 1.460921729472  | 5.395398917508  |
| H | 3.258469218530  | 1.127626762893  | 3.425454382675  |
| C | 1.359966969220  | 1.332375053965  | 6.240139793204  |
| H | -0.675471042979 | 0.637367435253  | 6.395019680443  |
| H | 3.383207816944  | 1.909423691514  | 5.763968109020  |
| H | 1.409844719336  | 1.679900030769  | 7.267943765316  |
| C | 4.716897855541  | -2.489395092927 | -0.329257058324 |
| C | 5.720411503787  | -3.079426312479 | 0.458322433654  |
| C | 5.019811052147  | -2.167612928738 | -1.662356061463 |

|   |                |                 |                 |
|---|----------------|-----------------|-----------------|
| C | 6.988723718701 | -3.320054018572 | -0.065841859801 |
| H | 5.503716051080 | -3.373137950348 | 1.480031848161  |
| C | 6.287959303762 | -2.406403133635 | -2.186208013444 |
| H | 4.235717279355 | -1.728150271027 | -2.268573176668 |
| C | 7.280180535496 | -2.981536995031 | -1.389317529625 |
| H | 7.749831573115 | -3.780897788803 | 0.557846952477  |
| H | 6.504500297985 | -2.143603153795 | -3.218276218692 |
| H | 8.269456245689 | -3.170606852173 | -1.796637191125 |

## TS11

E(RB+HF-LYP) = -1378.68368073 A.U.

1 imaginary frequencies -366.8980 cm<sup>-1</sup>

|   |                 |                 |                 |
|---|-----------------|-----------------|-----------------|
| C | 0.000000000000  | 0.000000000000  | 0.000000000000  |
| C | 0.000000000000  | 0.000000000000  | 1.392500730000  |
| C | 1.199129135862  | 0.000000000000  | 2.150087915669  |
| C | 2.053021903907  | 1.910767431941  | 2.547843881503  |
| C | 1.292286842344  | 2.847874201265  | 1.786663909533  |
| C | 1.384711532668  | 2.962279548051  | 0.415014584088  |
| C | 0.633363024369  | 3.960002912969  | -0.327919965047 |
| O | 2.202490135046  | 2.207248927881  | -0.333939327840 |
| N | 0.324497697558  | 3.884162862899  | -1.654684105242 |
| N | 0.158200842718  | 5.169237676915  | 0.105716336892  |
| C | -0.348616923579 | 5.028211746808  | -2.036899171151 |
| C | 0.642564408024  | 2.793308751697  | -2.590230125565 |
| C | -0.460173635377 | 5.825522250717  | -0.946976339739 |
| C | 0.366821668860  | 5.782405873000  | 1.414295302792  |
| H | 0.533644923073  | 3.422489722649  | 2.305997303323  |
| H | 2.984708400445  | 1.626647946415  | 2.065350066807  |
| H | 2.090003914323  | -0.318079896800 | 1.619142959104  |
| H | -0.933420431297 | -0.048133591179 | 1.940249828349  |
| O | 1.088594367674  | 0.085838943970  | -0.709114714891 |
| H | 1.803747690082  | 1.200071286290  | -0.433106238882 |
| H | -0.695770893169 | 5.167583936059  | -3.047523948460 |
| H | 1.678242092946  | 2.880342888390  | -2.921185038929 |
| H | -0.035181352218 | 2.890535302752  | -3.439651079745 |
| H | 0.508307659920  | 1.824382996199  | -2.115511987279 |
| H | -0.916911793776 | 6.793566292275  | -0.822487426237 |
| H | 1.337948604762  | 5.476862727057  | 1.805172741849  |
| H | -0.411373792163 | 5.485859182404  | 2.122246041210  |
| H | 0.343546733069  | 6.866240956043  | 1.290060257996  |
| C | 1.088738778713  | -0.508956476361 | 3.539511654026  |
| O | 0.091666841590  | -0.467457898787 | 4.236833280774  |
| O | 2.264953854719  | -1.035577695410 | 3.965097321528  |
| C | 2.262830818081  | -1.514786852309 | 5.317340489926  |
| H | 1.498370790816  | -2.284081403999 | 5.453367354221  |
| H | 3.256666249528  | -1.931569805800 | 5.483417410855  |
| H | 2.071636662468  | -0.696741464730 | 6.015848327622  |

|   |                 |                 |                 |
|---|-----------------|-----------------|-----------------|
| C | 2.181781130661  | 2.136548964600  | 4.006685538805  |
| C | 1.092156783722  | 2.512900350933  | 4.814663944123  |
| C | 3.434089513575  | 1.980267230543  | 4.628898895614  |
| C | 1.256544008219  | 2.753642141640  | 6.176967495010  |
| H | 0.100310841316  | 2.582897013155  | 4.378272755767  |
| C | 3.599103190397  | 2.218653605298  | 5.991944987781  |
| H | 4.286397259892  | 1.676650501608  | 4.027086103414  |
| C | 2.511378398527  | 2.613260754873  | 6.774346382542  |
| H | 0.397273452433  | 3.037687722335  | 6.778331260296  |
| H | 4.580397858990  | 2.099577855633  | 6.443404956585  |
| H | 2.637694081874  | 2.800654921737  | 7.836707460791  |
| C | -1.280155878330 | -0.162440308860 | -0.761420096909 |
| C | -2.545346503716 | 0.115925096186  | -0.215633789316 |
| C | -1.216242089356 | -0.616436230881 | -2.090149138273 |
| C | -3.703376244687 | -0.056505808155 | -0.971716114467 |
| H | -2.626086629188 | 0.485752973448  | 0.801263283933  |
| C | -2.374691529805 | -0.796500829553 | -2.843374259812 |
| H | -0.238627287622 | -0.831739427911 | -2.507605534921 |
| C | -3.625097189967 | -0.515922795131 | -2.288576735830 |
| H | -4.670692197521 | 0.170873916308  | -0.531840084723 |
| H | -2.302657464581 | -1.161056785085 | -3.864768759883 |
| H | -4.529340320754 | -0.653814123908 | -2.874729786755 |

## TS12

E(RB+HF-LYP) = -1378.66835960 A.U.

1 imaginary frequencies -112.0045 cm<sup>-1</sup>

|   |                 |                 |                 |
|---|-----------------|-----------------|-----------------|
| C | 0.000000000000  | 0.000000000000  | 0.000000000000  |
| O | 0.000000000000  | 0.000000000000  | 1.384092300000  |
| C | 1.352640431560  | 0.000000000000  | -0.577323335557 |
| C | 2.485423438830  | -0.305330395387 | 0.088382432104  |
| H | 1.438710800258  | 0.257133229980  | -1.628944843424 |
| H | 2.464372045662  | -0.510896834757 | 1.151990979256  |
| C | -1.389288168693 | -1.751655391731 | -1.619996047500 |
| N | -2.655295812392 | -1.434507888622 | -1.986770269729 |
| N | -0.748467774394 | -2.125227464126 | -2.766570237232 |
| C | -2.807821889210 | -1.601450360051 | -3.348966154533 |
| C | -1.621569092787 | -2.034467881240 | -3.837274778931 |
| H | -3.743341502696 | -1.393790019150 | -3.841896054046 |
| H | -1.319495508274 | -2.293010239924 | -4.838881764385 |
| C | -3.748686734243 | -0.925884744824 | -1.140594968795 |
| H | -4.653383397146 | -1.486982283776 | -1.386570198005 |
| H | -3.444925933257 | -1.076350758546 | -0.105439431076 |
| H | -3.892602323053 | 0.135126071331  | -1.353945332190 |
| C | 0.626044177567  | -2.610271865030 | -2.933511038492 |
| H | 0.803393772403  | -2.723473084750 | -4.003366725823 |
| H | 1.345707667964  | -1.897045134104 | -2.532080907500 |
| H | 0.750858520431  | -3.574999808439 | -2.441529894559 |

|   |                 |                 |                 |
|---|-----------------|-----------------|-----------------|
| C | -0.848041073651 | -1.691796034277 | -0.198917135951 |
| O | -1.778212374474 | -1.645245206575 | 0.724145933426  |
| H | -0.773161373597 | -0.605290489741 | 1.592812141316  |
| C | 0.232236839421  | -2.726841127681 | 0.064309300864  |
| C | 0.028173967766  | -3.704681002243 | 0.960067198325  |
| H | 1.195938989038  | -2.628972918186 | -0.418741527232 |
| H | -0.956229828209 | -3.745746372942 | 1.422273613102  |
| C | -0.921494641542 | 1.052190856415  | -0.588376042812 |
| C | -0.974243957260 | 1.348730606663  | -1.962193416021 |
| C | -1.793818167551 | 1.746246368000  | 0.264188746776  |
| C | -1.870405416266 | 2.291792100824  | -2.464040373601 |
| H | -0.314550210872 | 0.840341843654  | -2.659726877286 |
| C | -2.688803917004 | 2.692742388999  | -0.235031488623 |
| H | -1.741065522312 | 1.544378795978  | 1.326567346686  |
| C | -2.737526726816 | 2.968607027144  | -1.602368233025 |
| H | -1.884783141963 | 2.504740596108  | -3.529724350298 |
| H | -3.347689924408 | 3.220124158254  | 0.449545041623  |
| H | -3.430762444337 | 3.708889655001  | -1.991440428724 |
| C | 0.998132687396  | -4.730244758710 | 1.366242463668  |
| C | 2.387333296806  | -4.583016539796 | 1.188425807440  |
| C | 0.531071771011  | -5.913861290411 | 1.965470435765  |
| C | 3.266279223034  | -5.593273947746 | 1.568656998311  |
| H | 2.782545431996  | -3.657869788250 | 0.779569757280  |
| C | 1.410594317081  | -6.926417257387 | 2.344072049411  |
| H | -0.536942055959 | -6.036563103964 | 2.126348302029  |
| C | 2.782973130518  | -6.772214556909 | 2.143356466891  |
| H | 4.334809002851  | -5.454324044057 | 1.430544342123  |
| H | 1.024841814470  | -7.833572524262 | 2.800760423305  |
| H | 3.471961662269  | -7.555992108642 | 2.444385875680  |
| C | 3.807248902150  | -0.382593769343 | -0.543533943137 |
| O | 4.850917473243  | -0.588822231546 | 0.048299665431  |
| O | 3.764728300131  | -0.224709637851 | -1.905548308311 |
| C | 5.042847342596  | -0.257491540439 | -2.551296532268 |
| H | 4.843364390882  | -0.111820410736 | -3.613801172541 |
| H | 5.690842094283  | 0.538377852801  | -2.174863647324 |
| H | 5.541230672567  | -1.216201290256 | -2.383971382386 |



MPWB1K/6-31G\*\* computed total energies, unique frequency imaginary, and cartesian coordinates of the TSs involved in the formation of the lactone **22**.

## TS2

E(RmPW+HF-B95) = -806.199031239 A.U.

1 imaginary frequencies -363.3598 cm<sup>-1</sup>

|   |                 |                 |                 |
|---|-----------------|-----------------|-----------------|
| C | 0.000000000000  | 0.000000000000  | 0.000000000000  |
| C | 0.000000000000  | 0.000000000000  | 1.390079130000  |
| C | 1.166371295252  | 0.000000000000  | 2.128739372701  |
| C | 1.194992621380  | 0.267523890231  | 3.595429406696  |
| C | 1.564791723423  | -2.173940030339 | 1.924555870866  |
| C | 2.919784505020  | -2.317534800893 | 1.696490686443  |
| C | 0.916768473068  | -2.707871439716 | 3.155572458699  |
| C | 3.418685965106  | -2.160298599365 | 0.389979379587  |
| C | 4.873755724809  | -2.416623528280 | 0.120545040260  |
| C | -1.122601939160 | -0.291682018550 | -0.791251221558 |
| O | 1.145806957270  | 0.218471281853  | -0.690365970789 |
| N | -1.075763303017 | -0.839963430179 | -2.030630778222 |
| N | -2.436319595362 | -0.060205370854 | -0.529959751618 |
| C | -2.350564142333 | -0.957909775229 | -2.524242441985 |
| C | 0.100833275766  | -1.410419032806 | -2.645625233428 |
| C | -3.194774522913 | -0.481965445680 | -1.599850138413 |
| C | -2.940939760548 | 0.706692112287  | 0.573080445692  |
| H | -0.930855942444 | -0.195819648403 | 1.907621558293  |
| H | 2.059542307048  | 0.268451543502  | 1.585030968600  |
| H | 0.289603654432  | -0.079930984645 | 4.090654899892  |
| H | 2.044583088894  | -0.222895665079 | 4.069041348739  |
| H | 1.289318061846  | 1.334008806545  | 3.804942381456  |
| H | -2.541619512315 | -1.379231640686 | -3.490686172553 |
| H | 0.652171105197  | -2.004741473375 | -1.921670977317 |
| H | 0.761425131257  | -0.633381132440 | -3.008994828546 |
| H | -0.227111696756 | -2.040352292814 | -3.464915925408 |
| H | -4.262187256316 | -0.392126284888 | -1.604201109071 |
| H | -2.198463795175 | 1.450254788075  | 0.848581961830  |
| H | -3.151160822191 | 0.084420270779  | 1.439797353423  |
| H | -3.855252062269 | 1.203127473864  | 0.266682502421  |
| H | 0.956956206986  | -2.188402007488 | 1.030218682234  |
| H | 3.600755694958  | -2.529868624044 | 2.507258626607  |
| O | 2.704540342461  | -1.825217378147 | -0.582241438032 |
| H | 1.506823983258  | -2.508566458190 | 4.046477530384  |
| H | 0.818582871254  | -3.790064385107 | 3.067492807961  |
| H | -0.079120801861 | -2.297358331247 | 3.302050503460  |
| H | 5.412680262272  | -2.753886619860 | 1.000111862175  |
| H | 5.336374995153  | -1.505892204034 | -0.253822880689 |
| H | 4.965305339727  | -3.163431470013 | -0.664323448263 |
| H | 1.779207384993  | -0.537256553327 | -0.564958131446 |

### TS3

E(RmPW+HF-B95) = -806.235301666 A.U.

1 imaginary frequencies -355.8798 cm<sup>-1</sup>

|   |                 |                 |                 |
|---|-----------------|-----------------|-----------------|
| C | 0.000000000000  | 0.000000000000  | 0.000000000000  |
| C | 0.000000000000  | 0.000000000000  | 1.528822470000  |
| C | 1.428388714527  | 0.000000000000  | 2.029635143831  |
| C | 2.179688412700  | -1.008328596615 | 1.135161579831  |
| C | 0.624853700316  | 1.264700721969  | -0.586640514684 |
| C | 1.367619368672  | -1.190661075935 | -0.126867738308 |
| C | 3.614856827932  | -0.595304991346 | 0.879543774642  |
| C | 0.594713402447  | -2.391999816785 | -0.182904475183 |
| C | -0.226111790907 | -2.632613843877 | -1.422223308845 |
| O | 0.370188521628  | -3.167230542866 | 0.731074210642  |
| N | -1.497019730713 | -3.013673998283 | -1.391326854138 |
| N | 0.165684943068  | -2.637110392445 | -2.694593563685 |
| C | -1.936154320400 | -3.205718571697 | -2.664175929032 |
| C | -2.340870118841 | -2.959510044480 | -0.210990999793 |
| C | -0.894499312288 | -2.981676235970 | -3.488027049902 |
| C | 1.482273762999  | -2.319885145396 | -3.198998376360 |
| H | 1.838459995132  | -0.897495832585 | -1.056515259155 |
| H | 2.177571439837  | -1.964210488654 | 1.661679920013  |
| H | 3.656845720590  | 0.321180916642  | 0.291290872065  |
| H | 4.137516901448  | -0.406904365536 | 1.815864127155  |
| H | 4.166900121804  | -1.363390179771 | 0.341253210842  |
| H | -0.509228329403 | -0.908500766866 | 1.856517044053  |
| O | -1.069916619430 | -0.370717106774 | -0.607864445832 |
| H | 1.625611586076  | 1.490777176276  | -0.223310828041 |
| H | 0.653162570515  | 1.161529356742  | -1.668703212632 |
| H | -0.027676707680 | 2.105391615733  | -0.354175059539 |
| H | -2.948601865955 | -3.483331943849 | -2.877039877048 |
| H | -1.965299466364 | -3.649271483826 | 0.531824503330  |
| H | -3.347682207636 | -3.223080132374 | -0.511016195722 |
| H | -2.278952725288 | -1.928501948491 | 0.137932873232  |
| H | -0.809032731779 | -3.048333672879 | -4.553582836733 |
| H | 2.231800323764  | -2.628981292602 | -2.482601924194 |
| H | 1.568882732623  | -1.253218593803 | -3.377795836071 |
| H | 1.632974795085  | -2.859535822574 | -4.126223024845 |
| H | -0.577410598734 | 0.848641633826  | 1.896257901244  |
| H | 1.856004846952  | 0.991901089155  | 1.863018666151  |
| C | 1.568400703077  | -0.328362562793 | 3.500679582890  |
| H | 2.614958104522  | -0.368045610933 | 3.800862515527  |
| H | 1.074228419058  | 0.412268069805  | 4.126068344499  |
| H | 1.124101102421  | -1.299024832217 | 3.715398224978  |

### TS4

E(RmPW+HF-B95) = -806.24473627 A.U.

1 imaginary frequencies  $-113.4464 \text{ cm}^{-1}$

|   |                 |                 |                 |
|---|-----------------|-----------------|-----------------|
| C | 0.000000000000  | 0.000000000000  | 0.000000000000  |
| C | 0.000000000000  | 0.000000000000  | 1.535895920000  |
| C | 1.464487332787  | 0.000000000000  | 1.932621179249  |
| C | 2.069570364931  | -1.001963906372 | 0.948614169116  |
| C | -0.113228711778 | 1.413489468419  | -0.538801998071 |
| C | 1.317141748555  | -0.719488666632 | -0.345304780974 |
| C | 3.575035618423  | -0.938117910750 | 0.816031623126  |
| C | 0.660682574258  | -1.951283916235 | -0.955749474222 |
| C | -0.001015664268 | -1.837510409354 | -2.290190322268 |
| O | 0.761780723148  | -3.077241003306 | -0.504156301427 |
| N | -1.054438759123 | -2.593205655252 | -2.605484294603 |
| N | 0.356508928421  | -1.178945963946 | -3.397197387989 |
| C | -1.420881417369 | -2.344757776738 | -3.898164415103 |
| C | -1.790487630235 | -3.394627261840 | -1.650609262011 |
| C | -0.543666738885 | -1.463039129550 | -4.401322888736 |
| C | 1.526775142224  | -0.356277022507 | -3.589816608462 |
| H | 1.953682822397  | -0.185182791605 | -1.049679053321 |
| H | 1.786401326385  | -2.004483427323 | 1.273407901365  |
| H | 3.894153064031  | 0.045657619119  | 0.471151787047  |
| H | 4.069745331634  | -1.131808673617 | 1.765418038465  |
| H | 3.937385524987  | -1.677513530466 | 0.104761157981  |
| H | -0.466709321662 | -0.930789068274 | 1.857920067763  |
| O | -0.942172789086 | -0.837582963266 | -0.562131835882 |
| H | 0.640217747101  | 2.079642679231  | -0.118383588437 |
| H | -0.014921365312 | 1.416544299599  | -1.623729060056 |
| H | -1.097429144005 | 1.811219415233  | -0.302309810020 |
| H | -2.272535027814 | -2.817116666133 | -4.344478578692 |
| H | -1.861834508690 | -2.816498317299 | -0.737053047284 |
| H | -1.266110891343 | -4.322112579938 | -1.459343742790 |
| H | -2.774425158422 | -3.585660227560 | -2.062643127002 |
| H | -0.464082229748 | -1.020386823635 | -5.373243102048 |
| H | 1.403114477867  | 0.617297466512  | -3.128567268404 |
| H | 1.673072893176  | -0.229253350634 | -4.655576629078 |
| H | 2.401942770364  | -0.844941006001 | -3.179023048180 |
| H | -0.567277622802 | 0.825402322781  | 1.963625509767  |
| H | 1.885425204733  | 0.986947810229  | 1.710248532102  |
| C | 1.722087993473  | -0.323597607464 | 3.386823083226  |
| H | 2.785071212586  | -0.329303734977 | 3.620328724723  |
| H | 1.246607397287  | 0.401566566394  | 4.043766537112  |
| H | 1.321279704792  | -1.306351437854 | 3.631466839792  |

**TS5**

E(RmPW+HF-B95) =  $-806.246823651$  A.U.

1 imaginary frequencies  $-226.1958 \text{ cm}^{-1}$

|   |                |                |                |
|---|----------------|----------------|----------------|
| C | 0.000000000000 | 0.000000000000 | 0.000000000000 |
|---|----------------|----------------|----------------|

|   |                 |                 |                 |
|---|-----------------|-----------------|-----------------|
| C | 0.000000000000  | 0.000000000000  | 1.524935690000  |
| C | 1.473497504794  | 0.000000000000  | 1.911414417595  |
| C | 2.109653099635  | -0.912327282200 | 0.860597439674  |
| C | -0.495664260774 | 1.267728877873  | -0.637385884486 |
| C | 1.369145789776  | -0.536999895169 | -0.418083546280 |
| C | 3.613839892632  | -0.799659065543 | 0.752898822596  |
| C | 0.561223233430  | -1.676402536614 | -1.044592935765 |
| C | 0.442307788383  | -1.117441031946 | -2.968958667750 |
| O | 0.808589507046  | -2.863054283048 | -1.116729994465 |
| N | -0.592604103702 | -0.889087905508 | -3.789687180520 |
| N | 1.449824188827  | -1.449112377711 | -3.789919733473 |
| C | -0.238629292598 | -1.065024305154 | -5.105633319971 |
| C | -1.918952215762 | -0.536511633136 | -3.343739118380 |
| C | 1.057779990081  | -1.420252405541 | -5.103656181965 |
| C | 2.754645543927  | -1.850295954453 | -3.318845468753 |
| H | 1.955788943633  | 0.073685594055  | -1.098469430049 |
| H | 1.851744447961  | -1.945785532601 | 1.103866609923  |
| H | 3.908099650615  | 0.217846423637  | 0.496307569435  |
| H | 4.104331128177  | -1.063061532559 | 1.687363629854  |
| H | 4.001428209258  | -1.464321554956 | -0.015987324684 |
| H | -0.473350151047 | -0.920294320865 | 1.864241964862  |
| O | -0.653737721601 | -1.167272728166 | -0.541236065439 |
| H | 0.036418762788  | 2.126454228909  | -0.232857846715 |
| H | -0.337637083523 | 1.241928641011  | -1.712926088679 |
| H | -1.557304899711 | 1.405380124783  | -0.440643414405 |
| H | -0.930900473299 | -0.935195426409 | -5.914032165661 |
| H | -1.960395835431 | -0.690025782599 | -2.272981919873 |
| H | -2.648748237165 | -1.175040039931 | -3.831471877701 |
| H | -2.138719118112 | 0.501598579407  | -3.579158584878 |
| H | 1.721491704725  | -1.660028391384 | -5.910961938841 |
| H | 2.617509972631  | -2.454831260737 | -2.428085467301 |
| H | 3.371030259814  | -0.983498298278 | -3.096236360848 |
| H | 3.241117176143  | -2.440851647005 | -4.087065203497 |
| H | -0.550344521488 | 0.836118405215  | 1.952711934234  |
| H | 1.867813661147  | 1.009070517678  | 1.749783572477  |
| C | 1.736345285075  | -0.404440335780 | 3.343912974209  |
| H | 2.798094246757  | -0.385382455786 | 3.579304475447  |
| H | 1.234406395910  | 0.261086474513  | 4.042868256543  |
| H | 1.371367696119  | -1.414310172469 | 3.525192869846  |

### TS7

E(RmPW+HF-B95) = -806.19340654 A.U.

1 imaginary frequencies -399.7529 cm<sup>-1</sup>

|   |                |                 |                |
|---|----------------|-----------------|----------------|
| C | 0.000000000000 | 0.000000000000  | 0.000000000000 |
| C | 0.000000000000 | 0.000000000000  | 1.396896700000 |
| C | 1.188364477353 | 0.000000000000  | 2.114865613859 |
| C | 1.224715967519 | -0.526567210848 | 3.511610288174 |

|   |                 |                 |                 |
|---|-----------------|-----------------|-----------------|
| C | 1.984877107101  | 2.050468222034  | 2.482835092225  |
| C | -1.314334891410 | -0.019360115072 | -0.732243605493 |
| C | 1.146729328293  | 2.800668919115  | 1.674519405540  |
| C | 1.993127101827  | 2.338131024937  | 3.953868857265  |
| C | 1.217737322106  | 2.814312981208  | 0.296639365704  |
| C | 0.317284156676  | 3.504209411443  | -0.550929702818 |
| O | 2.212101185603  | 2.151893503014  | -0.334392844284 |
| N | 0.182739384254  | 3.302483152395  | -1.885598094628 |
| N | -0.536384075409 | 4.515091997684  | -0.240981026072 |
| C | -0.750787383847 | 4.171757920276  | -2.386738816646 |
| C | 0.892563654814  | 2.351327026409  | -2.725055811704 |
| C | -1.204660049530 | 4.918425759957  | -1.373497849094 |
| C | -0.612022939122 | 5.222103691366  | 1.007989672546  |
| H | 0.293933397238  | 3.259636653087  | 2.151762295951  |
| H | 2.930629290489  | 1.771742346750  | 2.039776803362  |
| H | 0.981275386823  | 2.413241565377  | 4.351354726866  |
| H | 2.510644299961  | 1.575549737348  | 4.527060547140  |
| H | 2.495246491382  | 3.282871546149  | 4.171182817203  |
| H | 2.060136051677  | -0.205219287852 | 1.509086549289  |
| H | -0.946519308228 | 0.040182414740  | 1.917045106178  |
| H | 0.489876002141  | -0.041603772239 | 4.150495848859  |
| H | 2.201908796486  | -0.421073752538 | 3.970500047853  |
| H | 0.987983062550  | -1.590633948123 | 3.493919585708  |
| O | 1.047864083397  | -0.041966718414 | -0.703376611354 |
| H | -1.404399813974 | 0.868553805664  | -1.356794278314 |
| H | -1.337161519194 | -0.878575500564 | -1.398589033621 |
| H | -2.168964061727 | -0.062803024266 | -0.064339086735 |
| H | 1.925994033317  | 1.193228160126  | -0.426342382885 |
| H | -1.014430278878 | 4.170112477381  | -3.425078646497 |
| H | 1.934438941602  | 2.633540544552  | -2.811133493026 |
| H | 0.419755218730  | 2.381496515881  | -3.700500736772 |
| H | 0.830955662856  | 1.350017157704  | -2.312377984782 |
| H | -1.937695955269 | 5.698924791462  | -1.346383729725 |
| H | 0.385316860653  | 5.325503843763  | 1.424138566331  |
| H | -1.244164026582 | 4.707723945274  | 1.726636019299  |
| H | -1.025529735632 | 6.205868751429  | 0.817230218784  |
